# Supplementary material
Source: HighWire-hosted journal article supplement (https://www.highwirestage.com/highwire/filestream/52845/field_highwire_adjunct_files/0/16-00500.pdf)
Supplement: 16-00500.pdf [file 16-00500.pdf]

**On-line Table: Select examples of the Centers for Medicare & Medicaid Physician Quality Reporting System codes and details of each code<sup>a</sup>**

| Measure Code | Title                                                                                                                               | Measure Developer/Steward                                                                                                                              | Description                                                                                                                                                                                                                                                                                         |
|--------------|-------------------------------------------------------------------------------------------------------------------------------------|--------------------------------------------------------------------------------------------------------------------------------------------------------|-----------------------------------------------------------------------------------------------------------------------------------------------------------------------------------------------------------------------------------------------------------------------------------------------------|
| 145          | Radiology: Exposure Time Reported for Procedures Using Fluoroscopy                                                                  | American College of Radiology, American Medical Association–Physician Consortium for Performance Improvement                                           | Percentage of final reports for procedures using fluoroscopy that document radiation exposure indices or exposure time and number of fluorographic images (if radiation exposure indices are not available)                                                                                         |
| 195          | Radiology: Stenosis Measurement in Carotid Imaging Reports                                                                          | American College of Radiology, American Medical Association–Physician Consortium for Performance Improvement                                           | Percentage of final reports for carotid imaging studies (neck MRA, neck CTA, neck duplex ultrasound, carotid angiography) performed that include direct or indirect reference to measurements of distal internal carotid diameter as the denominator for stenosis measurement                       |
| 344          | Rate of Carotid Artery Stenting for Asymptomatic Patients, Without Major Complications (Discharged to Home by Postoperative Day #2) | Society for Vascular Surgeons                                                                                                                          | Percentage of asymptomatic patients undergoing CAS who are discharged to home no later than postoperative day 2                                                                                                                                                                                     |
| 345          | Rate of Postoperative Stroke or Death in Asymptomatic Patients Undergoing Carotid Artery Stenting                                   | Society for Vascular Surgeons                                                                                                                          | Percentage of asymptomatic patients undergoing CAS who experience stroke or death following an operation while in the hospital                                                                                                                                                                      |
| 406          | Appropriate Follow-Up Imaging for Incidental Thyroid Nodules in Patients                                                            | American College of Radiology                                                                                                                          | Percentage of final reports for CT or MRI studies of the chest or neck or ultrasound of the neck for patients 18 years of age and older with no known thyroid disease with a thyroid nodule <1.0 cm noted incidentally, with follow-up imaging recommended                                          |
| 409          | Clinical Outcome Post Endovascular Stroke Treatment                                                                                 | Society of Interventional Radiology                                                                                                                    | Percentage of patients with a mRS score of 0–2 at 90 days following endovascular stroke intervention                                                                                                                                                                                                |
| 413          | Door-to-Puncture Time for Endovascular Stroke Treatment                                                                             | Society of Interventional Radiology                                                                                                                    | Percentage of patients undergoing endovascular stroke treatment who have a door-to-puncture time of <2 hr                                                                                                                                                                                           |
| 436          | Radiation Consideration for Adult CT: Utilization of Dose-Lowering Techniques                                                       | American College of Radiology, American Medical Association–Physician Consortium for Performance Improvement, National Committee for Quality Assurance | Percentage of final reports for patients 18 years of age and older undergoing CT with documentation of use of ≥1 of the following dose-reduction techniques:<br>Automated exposure control<br>Adjustment of the mA and/or kV according to patient size<br>Use of iterative reconstruction technique |

**Note:**—mRS indicates modified Rankin Scale; CAS, carotid artery stenting.

<sup>a</sup> Codes have been chosen to provide both diagnostic and interventional examples. Data from the Centers for Medicare & Medicaid Services and the American College of Radiology.<sup>34</sup>
